# Supplementary material for: Mechanistic insights into interfaces and nitrogen vacancies in cobalt hydroxide/tungsten nitride catalysts to enhance alkaline hydrogen evolution
Source: Royal Society of Chemistry journal article supplement (doi:10.1039/d1ta01560e), 2021-01-01
Supplement: d1ta01560e1.pdf [file d1ta01560e1.pdf]

*Electronic Supplementary Information for:*

**Mechanistic insights into interfaces and nitrogen vacancies in cobalt  
hydroxide/tungsten nitride catalysts to enhance alkaline hydrogen  
evolution**

Huan Liu,<sup>†,a,b,e</sup> Zi-Shan Wu,<sup>†,b</sup> Ling Huang,<sup>b</sup> Bo-Wei Zhang,<sup>b</sup> Li-Chang Yin,<sup>\*,c</sup> Cheng-Yan Xu<sup>\*,a,d</sup>  
and Liang Zhen<sup>\*,a,d</sup>

<sup>a</sup> School of Materials Science and Engineering, Harbin Institute of Technology, Harbin 150001, China. E-mail: cy\_xu@hit.edu.cn; lzhen@hit.edu.cn

<sup>b</sup> Department of Chemistry and Energy Sciences Institute, Yale University, West Haven, CT 06516, USA

<sup>c</sup> Shenyang National Laboratory for Materials Science, Institute of Metal Research, Chinese Academy of Sciences, Shenyang 110016, China. E-mail: lcyin@imr.ac.cn

<sup>d</sup> Sauvage Laboratory for Smart Materials, School of Materials Science and Engineering, Harbin Institute of Technology (Shenzhen), Shenzhen 518055, China

<sup>e</sup> College of Chemical Engineering, Inner Mongolia University of Technology, Huhhot 010051, China

<sup>†</sup> These authors contributed equally.

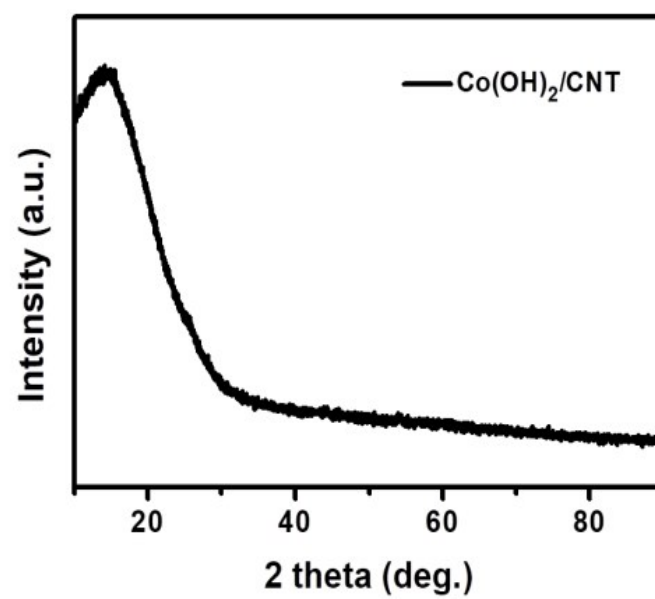

**Fig. S1** XRD pattern of Co(OH)<sub>2</sub>/CNTs.

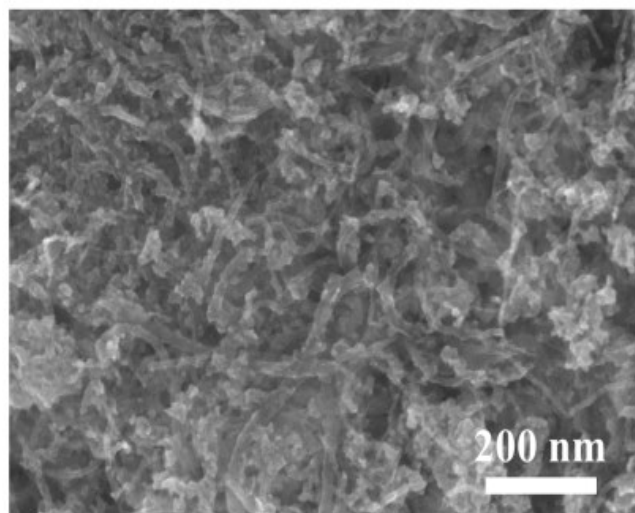

**Fig. S2** SEM image of Co(OH)<sub>2</sub>/c-WN<sub>1-x</sub>/CNTs catalysts.

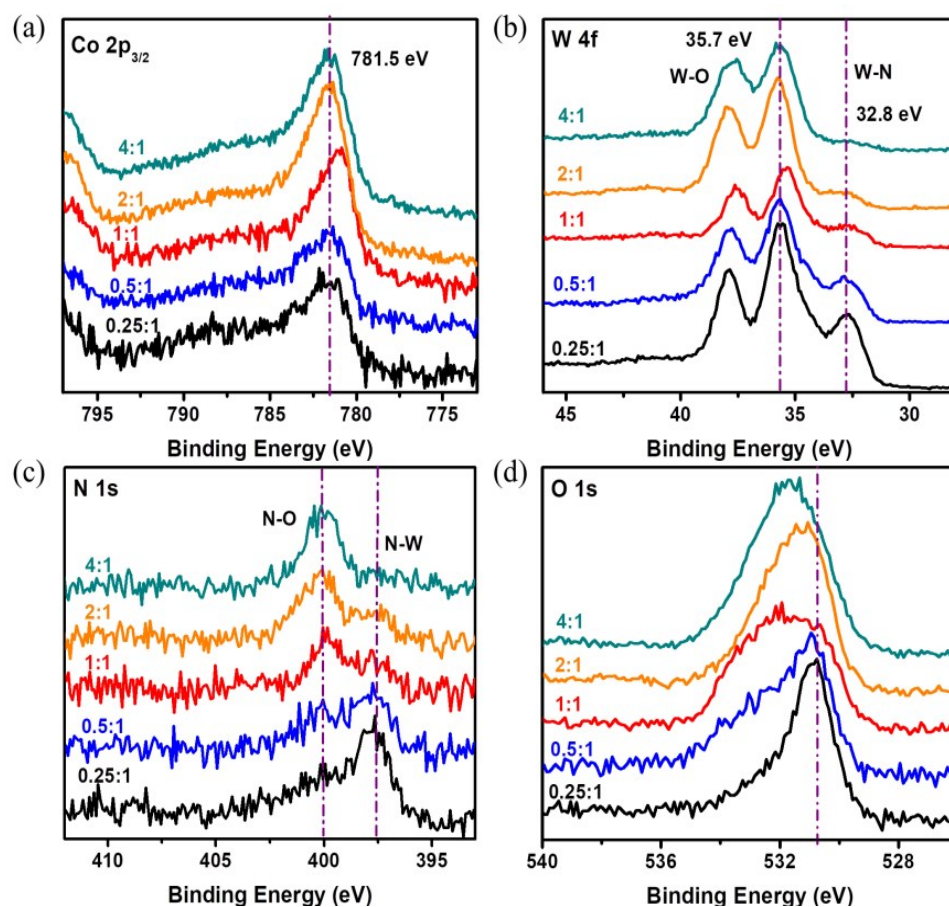

**Fig. S3** XPS spectra of (a) Co 2p<sub>3/2</sub>; (b) W4f; (c) N1s and (d) O1s of Co(OH)<sub>2</sub>/c-WN<sub>1-x</sub>/CNTs catalysts with different mole ratios.

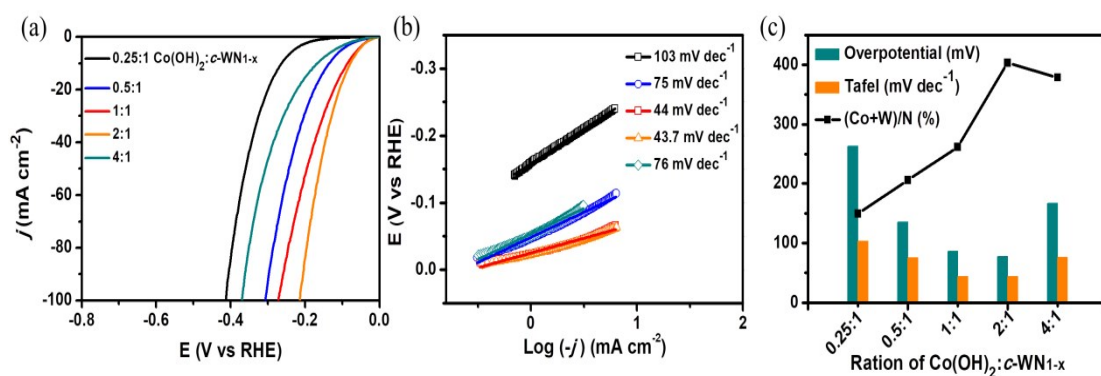

**Fig. S4** (a) Polarization curves; (b) Tafel slope and (c) Histogram of overpotential for achieving current density of 10 mA cm<sup>-2</sup>, Tafel slope and dot plot of surface atomic ratio ((Co+W)/N) for Co(OH)<sub>2</sub>/c-WN<sub>1-x</sub>/CNTs catalysts with different mole ratios.

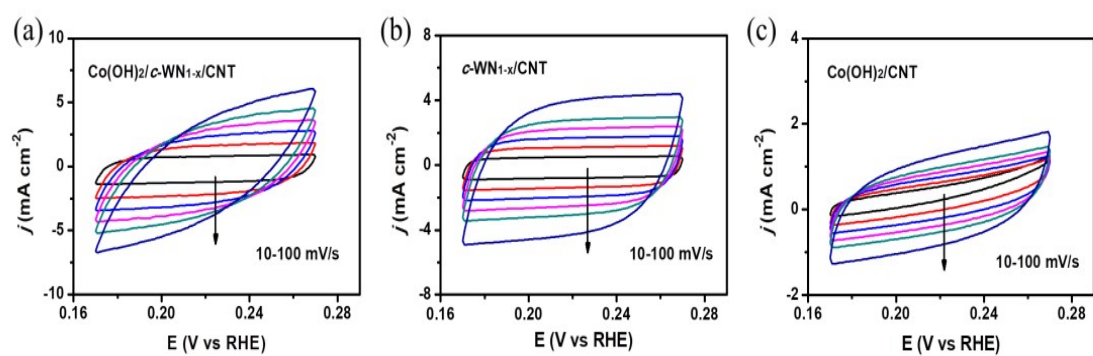

**Fig. S5** CV curves of (a)  $\text{Co(OH)}_2/\text{c-WN}_{1-x}/\text{CNTs}$ , (b)  $\text{c-WN}_{1-x}/\text{CNTs}$  and (c)  $\text{Co(OH)}_2/\text{CNTs}$  in the range of 0.166-0.266 V vs. RHE with different scan rates.

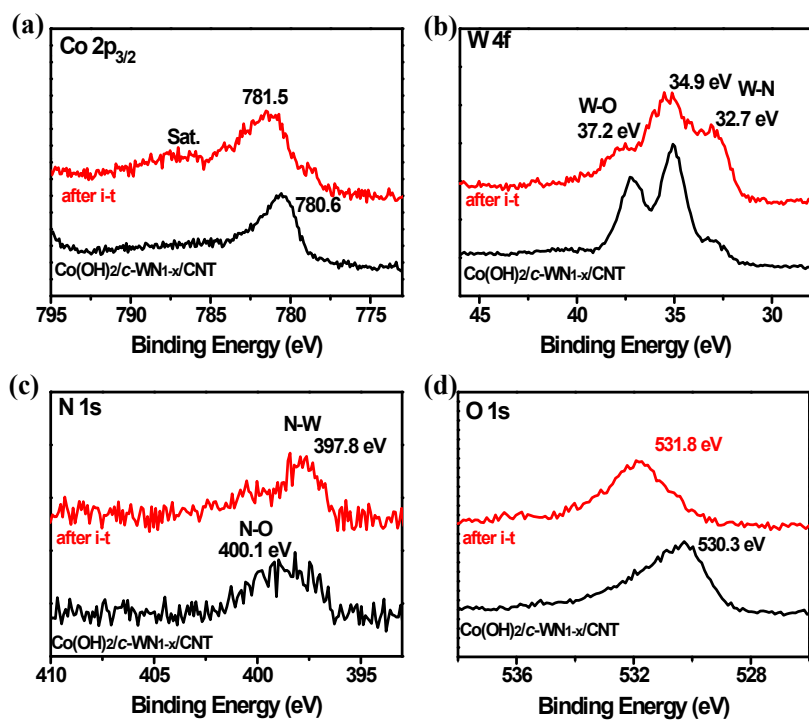

**Fig. S6** XPS spectra of (a) Co 2p<sub>3/2</sub>; (b) W4f; (c) N1s and (d) O1s of Co(OH)<sub>2</sub>/c-WN<sub>1-x</sub>/CNTs catalysts before and after *i-t* for 10 min.

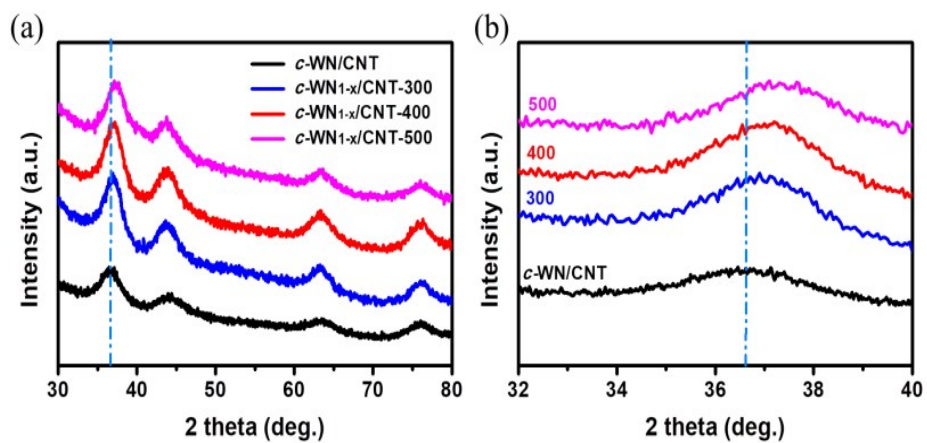

**Fig. S7** XRD patterns of *c*-WN/CNTs and *c*-WN<sub>1-x</sub>/CNTs annealed at 300, 400 and 500 °C under H<sub>2</sub> flow.

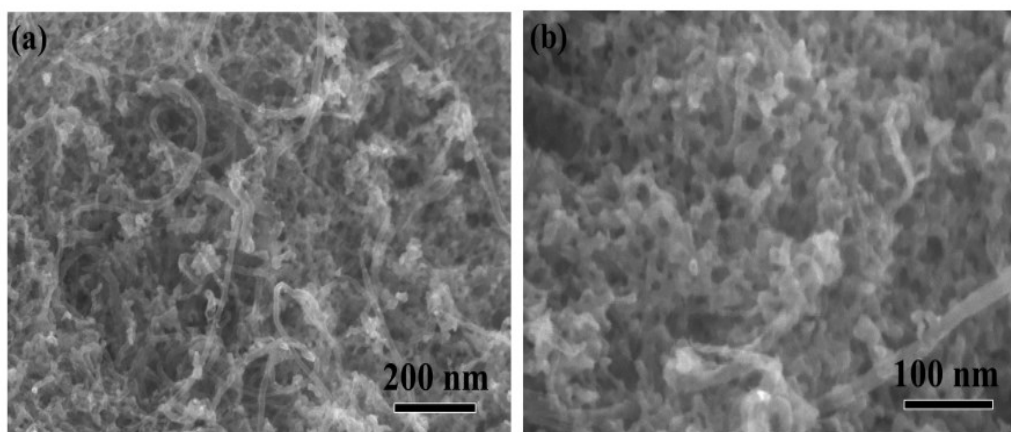

**Fig. S8** SEM images of  $c\text{-WN}_{1-x}/\text{CNTs}$  at different magnifications.

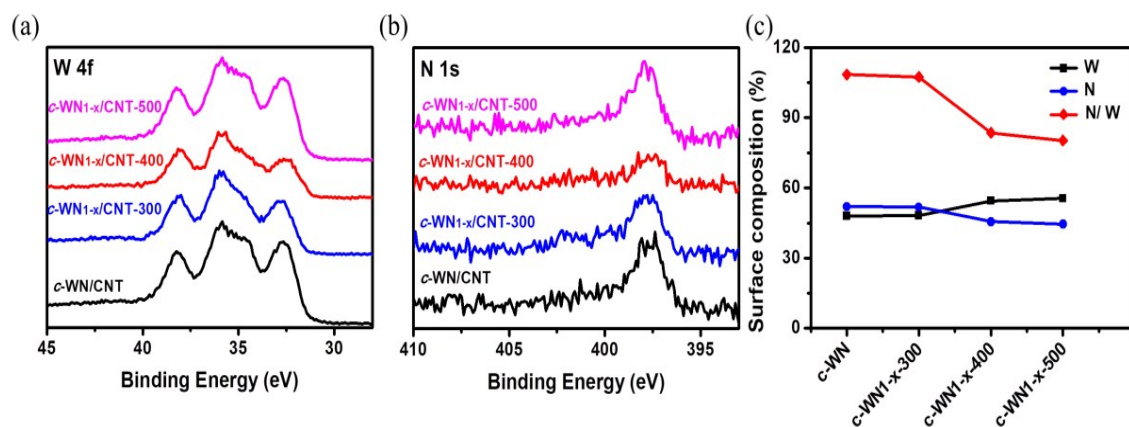

**Fig. S9** XPS spectra of (a) W4f; (b) N1s and (c) surface element composition of *c*-WN/CNTs

and *c*-WN<sub>1-x</sub>/CNTs annealed at 300, 400 and 500 °C under H<sub>2</sub> flow.

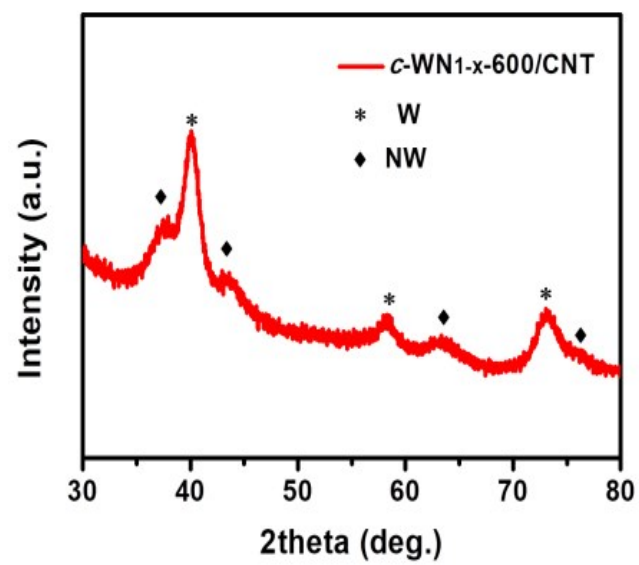

**Fig. S10** XRD patterns of  $c\text{-WN}_{1-x}/\text{CNTs}$  annealed at 600 °C under  $\text{H}_2$  flow.

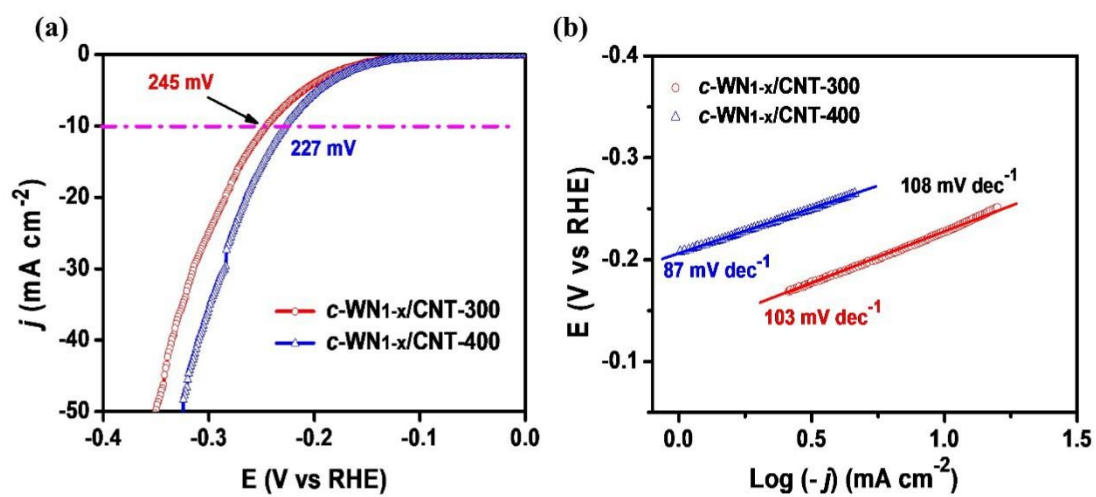

**Fig. S11** (a) Polarization curves; (b) Tafel slope of  $c\text{-WN}_{1-x}/\text{CNTs}$  annealed at 300 and 400 °C under  $\text{H}_2$  flow.

**Table S1** Comparison of hydrogen evolution performance for different tungsten-based electrocatalysts for water splitting.

| Catalysts                                     | Loading<br>(mg/cm <sup>2</sup> ) | Electrolyte | $\eta_{10}$ (mV) | Refs.                                            |
|-----------------------------------------------|----------------------------------|-------------|------------------|--------------------------------------------------|
| WN NW/CC<br>(hex)                             |                                  | 1 M KOH     | 130              | <i>J. Mater. Chem. A</i> 2017, 5, 19072-19078    |
| WN NA/CC<br>(orthorhombic)                    | 2.5                              | 1 M KOH     | 285              | <i>Electrochimica Acta</i> 154, 2015, 345-351    |
| W <sub>2</sub> C-NC-WN<br>(hex)               | 0.2                              | 1 M KOH     | 145              | <i>Int. J. Hydrogen Energy</i> 43, 1, 2018,16-23 |
| WON@NC NAs/CC<br>(cubic)                      | 7.7                              | 1 M KOH     | 130              | <i>ChemSusChem</i> 2015, 8, 2487-2491            |
| W/N doped C                                   | 0.204                            | 0.1 M KOH   | 85               | <i>Adv. Mater.</i> 2018, 30, 1800396             |
| Ni <sub>0.54</sub> W <sub>0.26</sub> Se       | 0.45                             | 1 M KOH     | 162              | <i>Chem. Asian J.</i> 2018, 13, 2040-2045        |
| Ni/WC@NC                                      | 0.7                              | 1 M KOH     | 77               | <i>Energy Environ. Sci.</i> 2018, 11, 2114-2123  |
| h-WN/Co <sub>2.45</sub>                       | 0.196                            | 1 M KOH     | 76               | <i>J. Mater. Chem. A</i> 2018, 6, 10967-10975    |
| WC <sub>x</sub> NWs                           |                                  | 1 M KOH     | 122              | <i>J. Mater. Chem. A</i> 2017, 5, 13196-13203    |
| WP/W                                          |                                  | 1 M KOH     | 133              | <i>Chem. Eng. J.</i> 2017, 327, 705-712          |
| Co(OH) <sub>2</sub> /c-WN <sub>1-x</sub> /CNT | 1.6                              | 1 M KOH     | 78               | this work                                        |
